# Supplementary material for: Landscape and microhabitat features determine small mammal abundance in forest patches in agricultural landscapes
Source: PeerJ. 2021 Nov 16;9:e12306. doi: 10.7717/peerj.12306 (PMC8603830; doi:10.7717/peerj.12306)
Supplement: Supplemental Information 2 [file peerj-09-12306-s002.xls]

## Sheet: metrics
Patch_name	Area	Perimeter	Area_perimeter_ratio	PSI	MPI_250	MPI_500	MNN_250	MNN_500	IJI_250	IJI_500	MPS_250	MPS_500	MSIDI_250	MSIDI_500	RAI	Species
Allev	4747	342	13.8801	1.40027	261602	136809	283	7432	7091	7841	111	69	107	101	57.2843	A. agrarius
Braida	9828	384	25.5938	1.09268	6642	82440	954	2212	7728	8644	39	65	91	51	0	A. agrarius
MA1	43806	1515	28.9149	2.04193	178	0	10331	1	9339	6702	190	780	60	38	26.5585	A. agrarius
MA2	9325	738	12.6355	2.15589	427145	278040	1171	2325	6766	6834	45	49	25	56	38.5228	A. agrarius
MA3	30647	1726	17.7561	2.78126	713	14727	6494	3917	7991	7921	99	103	66	54	9.41799	A. agrarius
Sal	3743	321	11.6604	1.4801	10566	5782	1338	9290	6539	7838	61	67	85	58	52.2235	A. agrarius
TO1	21301	990	21.5162	1.91351	141	3412	1	8269	7169	9030	239	72	88	98	90.8467	A. agrarius
TO2	79112	1212	65.2739	1.76538	132	93720	1	1377	8389	8536	1248	514	72	115	44.5098	A. agrarius
TO3	4627	469	9.86567	1.94499	278486	439320	2861	2212	7711	8805	96	168	69	102	0	A. agrarius
TO4	34721	2796	12.4181	4.23288	2907450	1254460	100	1609	7076	8507	291	184	105	74	90.2117	A. agrarius
TO5	28735	1706	16.8435	2.83902	95	4537	12619	5471	6985	8040	151	79	86	95	62.3009	A. agrarius
TO6	18942	1288	14.7065	2.63996	76692	195205	395	651	8191	8509	43	105	129	81	17.4355	A. agrarius
ZO1	43040	1872	22.9915	2.54545	1067357	516585	2027	1515	9284	8836	108	53	116	104	40.4313	A. agrarius
ZO2	17202	898	19.1559	1.93144	93113	35932	1025	2735	9317	8966	50	26	121	101	47.2013	A. agrarius
ZO3	65953	2172	30.3651	2.38582	6014	428773	4509	1592	7596	9256	208	144	99	106	54.5748	A. agrarius
ZO4	8102	454	17.8458	1.42284	58150	7245	2761	4612	9576	8806	50	166	114	104	98.4257	A. agrarius
ZO5	21126	713	29.6297	1.38381	28402	33310	3590	5965	8982	9362	78	85	140	119	89.2224	A. agrarius
ZO6	22147	902	24.5532	1.7098	1966	28495	5610	5193	8512	9444	116	79	118	123	55.9305	A. agrarius
ZO7	14891	881	16.9024	2.03662	9046	10618	943	3140	7474	8165	81	37	89	86	0	A. agrarius
Allev	4747	342	13.8801	1.40027	261602	136809	283	7432	7091	7841	111	69	107	101	37.012	A. sylvaticus
Braida	9828	384	25.5938	1.09268	6642	82440	954	2212	7728	8644	39	65	91	51	19.2192	A. sylvaticus
MA1	43806	1515	28.9149	2.04193	178	0	10331	1	9339	6702	190	780	60	38	79.5749	A. sylvaticus
MA2	9325	738	12.6355	2.15589	427145	278040	1171	2325	6766	6834	45	49	25	56	24.4851	A. sylvaticus
MA3	30647	1726	17.7561	2.78126	713	14727	6494	3917	7991	7921	99	103	66	54	22.5397	A. sylvaticus
Sal	3743	321	11.6604	1.4801	10566	5782	1338	9290	6539	7838	61	67	85	58	34.3928	A. sylvaticus
TO1	21301	990	21.5162	1.91351	141	3412	1	8269	7169	9030	239	72	88	98	4.34783	A. sylvaticus
TO2	79112	1212	65.2739	1.76538	132	93720	1	1377	8389	8536	1248	514	72	115	63.9197	A. sylvaticus
TO3	4627	469	9.86567	1.94499	278486	439320	2861	2212	7711	8805	96	168	69	102	37.6396	A. sylvaticus
TO4	34721	2796	12.4181	4.23288	2907450	1254460	100	1609	7076	8507	291	184	105	74	20.5128	A. sylvaticus
TO5	28735	1706	16.8435	2.83902	95	4537	12619	5471	6985	8040	151	79	86	95	22.4537	A. sylvaticus
TO6	18942	1288	14.7065	2.63996	76692	195205	395	651	8191	8509	43	105	129	81	55.2166	A. sylvaticus
ZO1	43040	1872	22.9915	2.54545	1067357	516585	2027	1515	9284	8836	108	53	116	104	39.0572	A. sylvaticus
ZO2	17202	898	19.1559	1.93144	93113	35932	1025	2735	9317	8966	50	26	121	101	46.7329	A. sylvaticus
ZO3	65953	2172	30.3651	2.38582	6014	428773	4509	1592	7596	9256	208	144	99	106	49.8764	A. sylvaticus
ZO4	8102	454	17.8458	1.42284	58150	7245	2761	4612	9576	8806	50	166	114	104	18.8734	A. sylvaticus
ZO5	21126	713	29.6297	1.38381	28402	33310	3590	5965	8982	9362	78	85	140	119	5.40541	A. sylvaticus
ZO6	22147	902	24.5532	1.7098	1966	28495	5610	5193	8512	9444	116	79	118	123	30.3947	A. sylvaticus
ZO7	14891	881	16.9024	2.03662	9046	10618	943	3140	7474	8165	81	37	89	86	22.6264	A. sylvaticus
